1 RESEARCH ARTICLE

2 Evidence of Resiliency in Maternal Health Services and Outcomes in Kono District, Sierra Leone during the COVID-  
3 19 Pandemic: An Observational Study

4 Foday Boima<sup>1</sup>, BSc; Zeleke Abebaw Mekonnen<sup>1\*</sup>, PhD; Manso M Koroma<sup>2</sup>, MSc; Marta Lado<sup>1</sup>, MD; Adrienne K.

5 Chan<sup>3</sup>, MD, MPH; Sharmistha Mishra<sup>3,4</sup>, MD, PhD; Alhaji U. N'jai<sup>5,6</sup>, PhD; Bailah Molleh<sup>7</sup>, MSc; Stephen Sevalie<sup>7,8</sup>,

6 MD; MSc; Sulaiman Lakoh<sup>7,9</sup>, MD, FWACP

7 Affiliations:

8 <sup>1</sup> Partners in Health, Sierra Leone

9 <sup>2</sup> Ernest Bai Koroma University of Science and Technology, Makeni, Sierra Leone

10 <sup>3</sup> Division of Infectious Diseases, Department of Medicine, Faculty of Medicine, University of Toronto, Toronto,  
11 Canada

12 <sup>4</sup> MAP Centre for Urban Health Solutions, Unity Health Toronto, Toronto, Canada

13 <sup>5</sup> College of Medicine and Allied Health Sciences, University of Sierra Leone, Freetown, Sierra Leone

14 <sup>6</sup> Koinadugu College, Koinadugu, Sierra Leone

15 <sup>7</sup> Research and Scientific Division, Sustainable Health Systems, Freetown, Sierra Leone

16 <sup>8</sup> 34 Military Hospital, Republic of Sierra Leone Armed Forces, Wilberforce, Sierra Leone

17 <sup>9</sup> Ministry of Health, Government of Sierra Leone, Freetown, Sierra Leone

18 \*Corresponding Author:

19 Zeleke Abebaw Mekonnen

20 Research Specialist, Partners In Health, Sierra Leone

21 Email: [zmekonnen@pih.org](mailto:zmekonnen@pih.org)

22 Phone: +23233615423

23 **Abstract**

24 **Background:** This study evaluated the resilience and outcomes of maternal health services  
25 during the COVID-19 pandemic in two health facilities in eastern Sierra Leone. Its aims to describe  
26 the use of maternal healthcare services and maternal and neonatal outcomes in these two  
27 facilities before, during, and after the COVID-19 pandemic.

28 **Methods:** The study involved analysis of routine programme data (March 2019 to February 2022)  
29 from two public-funded health facilities supported by a non-governmental organization (Partners  
30 In Health in Sierra Leone): Koidu Government Hospital and Wellbody Clinic. Aggregated and de-  
31 identified secondary data from the Partner In Health Maternal Health Database was abstracted  
32 using a standardized tool. Descriptive statistics and bivariable negative binomial regression were  
33 used to assess the association between time periods (before COVID-19 [March 2019 to February  
34 2020], during COVID-19 emergency [March 2020 to February 2021], after COVID-19 emergency  
35 [March 2021 to February 2022]) and outcomes each month (fourth antenatal care visit and facility  
36 deliveries).

37 **Results:** The study analyzed 3,204 fourth antenatal care visits and 7,369 deliveries over 36  
38 months at both health facilities. Fourth antenatal care visits (from 947 to 920) and facility  
39 deliveries (from 2309 to 2221) decreased during COVID-19 compared to pre-COVID-19.  
40 However, maternal (from 32 to 23) and neonatal (36 to 26) deaths declined during COVID-19  
41 compared to the pre-COVID-19 period at Koidu Government Hospital.

42 **Conclusion:** In Sierra Leone, the resources and efforts directed to the post-Ebola recovery  
43 strategy were tested during and after the COVID-19 pandemic. Our study demonstrates the

44 resilience of maternal and neonatal services in two healthcare facilities in a less-affected region  
45 of Sierra Leone, to the anticipated disruptions due to the COVID-19 pandemic.

46 **Keywords:** Health System, COVID-19, Antenatal Care, Maternal Mortality, Neonatal Mortality,  
47 Outcomes, Kono, Sierra Leone

## 49 **Introduction**

50 Sierra Leone has one of the highest maternal mortality rates in the world (1). For every 100,000  
51 live births, an estimated 717 women die from causes related to pregnancy and childbirth in the  
52 country (1). The neonatal mortality rate in Sierra Leone is 31 deaths per 1000 live births and  
53 remains far from the Sustainable Development Goal target of less than 12 per 1000 live births by  
54 2030 (2). Key to reducing maternal and neonatal mortality is an effective health system platform  
55 to provide maternal health services, including deliveries and operative care (such as caesarean  
56 sections) (2). Services provided within health facilities are vulnerable to structural shocks from  
57 infectious disease epidemics. Epidemics can lead to a shortage in the health workforce caused by  
58 healthcare-associated infections and fear among patients of acquiring infection in health facilities  
59 (3). Public health emergencies also lead to the redirection of clinical care from routine to  
60 epidemic-related services (4).

61 The 2014-2016 Ebola epidemic in Sierra Leone, with an estimated 14,000 confirmed cases and  
62 3,965 deaths (5), led to large disruptions across the health system. The Ebola epidemic resulted  
63 in a 22% decline in antenatal care and delivery services at primary health units in Sierra Leone (6),  
64 and a 20% decline in the number of hospital deliveries and caesarean sections (7), a pattern that  
65 was similar across all three West African countries severely affected by the Ebola outbreak (8–  
66 10). However, there was heterogeneity in the magnitude of disruptions to antenatal and obstetric  
67 care across districts in Sierra Leone (7). Districts with low numbers of confirmed Ebola cases  
68 experienced smaller reductions in antenatal care and facility deliveries (7).

69 Following the Ebola outbreak, the reproductive, maternal, neonatal, and child health programs  
70 remained a major priority for the Ministry of Health in Sierra Leone. The country's health-system  
71 recovery agenda included training of healthcare workers, robust data management systems in  
72 facilities, and drug supply (11). These health-system recovery efforts were underway when the  
73 COVID-19 pandemic hit in early 2020. An example of the post-Ebola and pre-COVID efforts to  
74 improve maternal and neonatal services in health facilities was the partnership between the  
75 Ministry of Health and Partners In Health to support a primary and a secondary health facility in  
76 Kono district, in Eastern Sierra Leone. In the primary health facility (Wellbody Clinic), investments  
77 included mentorship for maternity staff and the establishment of maternal waiting homes where  
78 women with high-risk pregnancies receive 24-hour monitoring before their due dates. In the only  
79 secondary health facility in Kono District (Koidu Government Hospital), post-Ebola health-system  
80 strengthening included resourcing critical infrastructure resources: installing 24-hour electricity  
81 and running water, local production of oxygen supplementation, a fully operational blood bank,  
82 and a special care baby unit. Koidu Government Hospital is the only facility providing specialist  
83 care for pregnancy complications, including caesarean sections in Kono District(12).

84 There is some evidence at the national level, (8,13) but this study will narrow the focus to one  
85 district with 2 hospitals national data suggest disruptions in maternal health services, with a  
86 decline in first antenatal care visits and facility-based deliveries in Sierra Leone (8). However,  
87 Kono experienced a smaller, cumulative confirmed cases of 112 than the more urban regions in  
88 the country with national cumulative confirmed cases of 7681 COVID-19 outbreak (14). The post-  
89 Ebola recovery investments in Wellbody Clinic and Koidu Government Hospital provide an  
90 opportunity to conduct a more focused examination of facility-level maternal health services and

91 maternal and neonatal outcomes in the context of the COVID-19 pandemic. We therefore sought  
92 to describe the use of maternal healthcare services and maternal and neonatal outcomes in these  
93 two facilities over time, before, during, and after the post-COVID-19 emergency in Sierra Leone.

## 94 **Methods**

### 95 *Study Design*

96 We applied a retrospective cross-sectional study design using facility-level programme data, to  
97 compare service use and health outcomes across three time periods; pre-, during, and post-  
98 COVID-19 pandemic. We utilized the STROBE (Strengthening the Reporting of Observational  
99 Studies in Epidemiology) guidelines in our study to ensure comprehensive and transparent  
100 reporting.

101

### 102 *Study Settings*

103 Sierra Leone has a population of 7.5 million people (12) with three levels of service delivery  
104 provided across 1,468 healthcare facilities as of December 2023: peripheral health units (primary  
105 care), district hospitals (secondary care), and tertiary hospitals (tertiary care). This study was  
106 conducted in two Partners In Health-supported facilities, a non-governmental organization that  
107 works in partnership with the Sierra Leone Ministry of Health, in Kono district located in the  
108 eastern region with an estimated population of 600,000, of which 75% reside in rural areas (12):  
109 Wellbody Clinic (a primary health care facility, serving a population of 21,000) and Koidu  
110 Government Hospital (a secondary health care facility, serving a population of approximately  
111 506,000 people) (**Figure 1**). Wellbody Clinic (with an average of 36 deliveries per month) provides  
112 basic emergency obstetric and newborn care. Koidu Government Hospital (with an average of

113 190 deliveries per month) provides comprehensive emergency obstetric care, including caesarian  
114 sections and onsite blood transfusion services.

#### 115 *Study Population*

116 *We reviewed the records* of pregnant and peripartum women and neonates who sought care at  
117 Wellbody Clinic and Koidu Government Hospital between March 2019 and February 2022.

#### 118 *Data Sources*

119 Data for this study was extracted from the Partners In Health Maternal Health Database on  
120 June 10, 2024. The database consists of secondary, de-identified, aggregate-level programme  
121 data reported monthly from the two health facilities which are aligned with nationally  
122 developed reportable data elements and indicators by the Ministry of Health.

#### 123 *Variables*

124 Our outcomes of interest were the monthly number of fourth ANC visits (ANC4), number of  
125 institutional deliveries, maternal mortality ratio (maternal deaths per 100,000 live births), and  
126 neonatal mortality ratio (neonatal deaths per 1,000 live births). These outcomes were selected  
127 because they represent key performance indicators for the healthcare system in Sierra Leone.  
128 We defined the following 12-month time periods of interest as follows: pre-COVID-19: (March  
129 2019 to February 2020), during the COVID-19 emergency: (March 2020 to February 2021), and  
130 post-COVID-19 emergency: (March 2021 to February 2022). The dates were chosen because the  
131 first diagnosed case of SARS-CoV-2 in Sierra Leone was on March 31, 2020 (15).

#### 132 *Data preparation and analyses*

133 Monthly data on numerators for the outcomes listed above and relevant denominators (number  
134 of live births) were manually extracted from the Partners in Health Maternal Health Database

135 and entered into an Excel database. The data in Excel was transposed into a long format from a  
136 wide format. Analyses were conducted in STATA15 (StataCorp LLC, College Station, TX), and  
137 included checks for missing data, data cleaning, and variable creation for analyses.

138 We used descriptive statistics to summarize outcomes by period. To address objective 1, we first  
139 visualized data on outcomes to describe trends in ANC4 visits and deliveries over the full study  
140 period, with demarcations to depict each period of interest. Next, to quantify the association  
141 between the period (exposure variable) and each count outcome (ANC4 visit; institutional  
142 delivery), we conducted bivariable negative binomial regression analysis (due to the observed  
143 over-dispersion for both count outcome variables)(16). We reported the incidence rate ratio (IRR)  
144 for each outcome with the corresponding 95% confidence interval (CI) using the during-COVID  
145 emergency period as the reference group. We interpreted observed differences between  
146 periods, based on the CI of the IRR. For objectives 2 and 3, we computed and described the  
147 maternal and neonatal mortality ratios for the three time periods, respectively. We did not  
148 conduct analyses of association due to the small number of outcomes.

#### 149 *Ethics*

150 Ethical approval was obtained from the Sierra Leone Ethics and Scientific Review Committee with  
151 approval number 018/05/2023. Routine secondary data was abstracted under a waiver of  
152 informed consent from the ethics committee and approval from the health facility management.

153

154

#### 155 **Results**



156 The study analyzed 3,204 fourth antenatal care visits and 7,369 deliveries over 36 months at both  
 157 health facilities. There was a similar number of ANC4 visits pre-COVID-19 (947) and during the  
 158 COVID-19 emergency (920), with a large increase post-emergency (1337), (**Table 1, Figure 2**) – a  
 159 pattern that was observed in both study sites. A similar overall pattern was observed with  
 160 institutional deliveries: from 2309 pre-COVID-19, 2221 during the emergency, and 2839 post-  
 161 emergency (**Table 1, Figure 3**). There were no maternal deaths or neonatal deaths at Wellbody  
 162 Clinic.

163 **Table 1: Maternal health service use and outcomes in a primary and secondary health facility in Kono District,**  
 164 **Sierra Leone before during, and after the COVID-19 emergency**

| Outcome                         | Number                                    |                                                        |                                                      |
|---------------------------------|-------------------------------------------|--------------------------------------------------------|------------------------------------------------------|
|                                 | Pre-COVID-19, March 2019 to February 2020 | During-COVID-19 emergency, March 2020 to February 2021 | Post-COVID-19 emergency, March 2021 to February 2022 |
| <b>ANC4 Visit</b>               |                                           |                                                        |                                                      |
| <b>Total</b>                    | <b>947</b>                                | <b>920</b>                                             | <b>1337</b>                                          |
| <b>Wellbody</b>                 | <b>164</b>                                | <b>99</b>                                              | <b>274</b>                                           |
| <b>KGH</b>                      | <b>783</b>                                | <b>821</b>                                             | <b>1063</b>                                          |
| <b>Institutional deliveries</b> |                                           |                                                        |                                                      |
| <b>Total</b>                    | <b>2309</b>                               | <b>2221</b>                                            | <b>2839</b>                                          |
| <b>Wellbody</b>                 | <b>482</b>                                | <b>413</b>                                             | <b>411</b>                                           |
| <b>KGH</b>                      | <b>1827</b>                               | <b>1808</b>                                            | <b>2428</b>                                          |
| <b>Live births</b>              |                                           |                                                        |                                                      |
| <b>Total</b>                    | <b>2246</b>                               | <b>2186</b>                                            | <b>2785</b>                                          |
| <b>Wellbody</b>                 | <b>488</b>                                | <b>415</b>                                             | <b>414</b>                                           |
| <b>KGH</b>                      | <b>1758</b>                               | <b>1771</b>                                            | <b>2371</b>                                          |
| <b>Maternal death</b>           |                                           |                                                        |                                                      |
| <b>Total</b>                    | <b>32</b>                                 | <b>23</b>                                              | <b>25</b>                                            |
| <b>Wellbody</b>                 | <b>0</b>                                  | <b>0</b>                                               | <b>0</b>                                             |

| KGH                   | 32        | 23        | 25        |
|-----------------------|-----------|-----------|-----------|
| <b>Neonatal death</b> |           |           |           |
| <b>Total</b>          | <b>36</b> | <b>26</b> | <b>17</b> |
| <b>Wellbody</b>       | <b>0</b>  | <b>0</b>  | <b>0</b>  |
| <b>KGH</b>            | <b>36</b> | <b>26</b> | <b>17</b> |

165 \* KGH refers to Koidu Government Hospital, ANC4 refers to the fourth antenatal care visit

166 \* Pre-covid-19 (March 2019-Feb 2020), During covid-19 Emergency (March 2020-Feb 2021), Post covid-19

167 Emergency (March 2021-Feb 2022)

168 The monthly number of ANC4 visits fluctuated during each period, but the observed pattern

169 suggests a steady increase over time and into the post-emergency period (**Figure 2**). Of note,

170 there was a sharp decline in January 2020, two months before the first case of SARS-CoV-2 was

171 detected in Sierra Leone, followed by rapid recovery in February 2020; and a similar pattern

172 was noted in December 2020.

173 The monthly number of institutional deliveries demonstrated a similar pattern of a steady

174 increase over the three time periods (**Figure 3**), albeit with fewer fluctuations than ANC4 visits.

175 Temporary declines in deliveries occurred in January 2020, August 2020, and February 2021 –

176 each followed by recovery to higher levels than just before each decline (**Figure 3**). With respect

177 to the mode of delivery, the monthly number of vaginal deliveries appeared to temporarily

178 decline during the COVID-19 emergency, whereas caesarian sections steadily increased over the

179 three time periods (**Figure 3**).

### 180 ***Impact of COVID-19 on maternal service utilization***

181 Relative to the period of COVID-19 emergency, there were no observable differences in the rate

182 of ANC4 visits during the pre-COVID-19 period [IRR=1.02, 95%CI: 0.61, 1.72] and during the post-

183 COVID-19 emergency [IRR=1.45, 95%CI: 0.87, 2.42] (**Table 2**). Relative to the COVID-19

184 emergency period, there was also no difference observed in maternal deliveries: pre-COVID-19

185 [IRR=1.03, 95%CI: 0.69, 1.56] and post- COVID-19 emergency [IRR=1.28, 95%CI: 0.85, 1.92] (**Table**  
 186 **2**).

187 **Table 2. Comparison in monthly ANC4 visits and institutional deliveries across three time-**  
 188 **periods, in two facilities in Kono District, Sierra Leone, March 2019-Feb 2022**

| Time period               | ANC4 visit |            | Total deliveries |            |
|---------------------------|------------|------------|------------------|------------|
|                           | IRR        | 95% CI     | IRR              | 95% CI     |
| Pre Covid-19              | 1.02       | 0.61, 1.72 | 1.03             | 0.69, 1.56 |
| During Covid-19 Emergency | Reference  |            | Reference (1)    |            |
| Post Covid-19 Emergency   | 1.45       | 0.87, 2.42 | 1.28             | 0.85, 1.92 |

189 \* IRR- Incidence rate ratio, CI- Confidence Interval, ANC- Antenatal care  
 190 \* Pre-covid-19 (March 2019-Feb 2020), During covid-19 Emergency (March 2020-Feb 2021), Post covid-19  
 191 Emergency (March 2021-Feb 2022)  
 192

193 ***Impact of COVID-19 on maternal and neonatal outcomes***

194 The maternal mortality ratio (per 100,000 live births) decreased over three time periods; 1,424  
 195 pre-COVID-19, 1,052 during the COVID-19 emergency, and 897 post-COVID-19 emergency.  
 196 Similarly, the neonatal death ratio per 1,000 live births reduced from 16.0 pre-COVID-19, 11.9  
 197 during the COVID-19 emergency, and 6.1 post-COVID-19 emergency (**Table 3**).

198  
 199  
 200  
 201  
 202  
 203

204 **Table 3. Maternal and neonatal outcomes across three time periods, in two facilities in Kono District,**  
205 **Sierra Leone, March 2019-Feb 2022**

| <b>Outcomes</b>                                             | <b>Pre-COVID-19<br/>(March 2019-Feb<br/>2020)</b> | <b>During COVID-19 Emergency<br/>(March 2020-Feb 2021)</b> | <b>Post COVID-19 Emergency<br/>(March 2021-Feb 2022)</b> |
|-------------------------------------------------------------|---------------------------------------------------|------------------------------------------------------------|----------------------------------------------------------|
| <b>Maternal Mortality Ratio<br/>per 100,000 live births</b> | 1,424                                             | 1,052                                                      | 897                                                      |
| <b>Infant Death Rate per 1,000<br/>live births</b>          | 16.0                                              | 11.9                                                       | 6.1                                                      |

206

## 207 **Discussion**

208 Using routine program data, we found maternal services and outcomes remained relatively  
209 stable in two health facilities in Sierra Leone, a primary and a secondary care center. These  
210 findings differ from what the national-level trends had suggested (8). Except for the short-term  
211 reduction in ANC4 visits in early 2020 shortly before the first reported cases of COVID-19 in Sierra  
212 Leone, there was a stable pattern in the uptake of maternal services and outcomes. Caesarian  
213 sections performed in the two facilities gradually increased into the post-emergency period.  
214 Although we were not able to conduct an analytic comparison due to small numbers, the overall  
215 maternal mortality ratio and neonatal mortality ratio declined over time – with the neonatal  
216 mortality ratio falling to well below national levels and the sustainable development goals target  
217 of less than 12 neonatal deaths per 1000 live births (17).

218 A distinct trend in the decline of ANC4 visits was observed before the first cases of the COVID-19  
219 pandemic with no sufficient evidence to justify the decline. However, the decline of ANC4 visits

220 was noted at both KGH and WBC during the COVID-19 pandemic, although it did not reach  
221 statistical significance when compared to the periods before and after the pandemic. This finding  
222 aligns with a study in Ethiopia, which similarly found no statistical difference in the frequency of  
223 ANC4 visits during the COVID-19 pandemic compared to the pre-pandemic era(18). Despite  
224 community awareness campaigns that emphasize the importance of ANC attendance by the  
225 Ministry of Health and Partners In Health, there is still a modest impact of the COVID-19  
226 pandemic on ANC4 visits. This impact manifested in two sharp declines following the initial  
227 reports of COVID-19 in March 2020 and a subsequent wave in December 2020. Nevertheless,  
228 ANC4 visits recovered swiftly thereafter, underscoring the resilience of the health system  
229 following public health emergencies.

230 Overall, there were disruptions in deliveries and ANC first visits at the national level during the  
231 COVID-19 pandemic (8). Unlike a previous study conducted in Sierra Leone (7), our study indicates  
232 that facility deliveries were relatively lower during the COVID-19 pandemic, although there was  
233 no statistically significant difference across the three periods. These low rates of deliveries during  
234 the pandemic likely reflect the mitigation strategies employed by both Partners In Health and the  
235 Ministry of Health during the pandemic to strengthen maternal health services utilization in Kono  
236 District. Robust structural and functional maternal referral systems were in place to halt a  
237 potentially major impact of the COVID-19 pandemic in this setting. Additionally, communication  
238 plans were developed to tackle misinformation campaigns, including efforts to address  
239 community members' fear of becoming infected at health facilities.

240 We found that the rate of maternal mortality and neonatal mortality declined over time even  
241 during the COVID-19 pandemic. This finding is contrary to the national reports of maternal and

242 neonatal mortality (1). The possible justification for this could be attributed to the  
243 comprehensive maternal and child health service provided by Partners In Health Sierra Leone  
244 and the heterogeneous distribution of COVID-19 cases across the country, with fewer cases in  
245 Kono district (14). Furthermore, these findings suggest resilience in maternal healthcare service  
246 due to lessons learned from the Ebola outbreak response strategies implemented in these two  
247 facilities. Our findings have important clinical and policy implications in strengthening maternal  
248 and neonatal health services in Partners In Health-supported health facilities and designing  
249 tailored strategies to improve maternal and neonatal care in the local context. These efforts are  
250 crucial for mitigating the impact of future health emergencies and ensuring continuous access to  
251 essential maternal and neonatal healthcare services.

252 The findings of this study should be interpreted in light of the following limitations. First, our  
253 rationale for focusing on two specific facilities was because of efforts made to support the post-  
254 Ebola recovery of these two facilities. However, this focus is affected by the small sample size of  
255 pregnant women and neonates recruited in this study. As a result, we have not been able to  
256 observe significant changes in maternal service delivery over time. Data on maternal and  
257 neonatal services from a larger number of facilities should be included in future studies. Second,  
258 the data used in our study is also limited to that available for programmatic monitoring, which  
259 does not allow us to explore variables that could provide a deeper understanding of access and  
260 uptake of maternal services. For example, we were not able to conduct longitudinal analyses at  
261 the individual level nor did we have estimates of the number of pregnancies. Therefore, we are  
262 unable to generalize the findings on ANC visits, deliveries, and maternal and neonatal outcomes  
263 to other areas of Sierra Leone.

264

265 **Conclusion**

266 In Sierra Leone, the efforts put into place and resourced as part of the post-Ebola recovery efforts  
267 were tested during and after the COVID-19 emergency. Our study demonstrates the resilience of  
268 two healthcare facilities in a less-affected region of Sierra Leone, to the anticipated disruptions  
269 due to the COVID-19 pandemic. Further evaluation and research are recommended to sustain  
270 these achievements in future public health emergencies.

271

272 **Declaration**

273 **Acknowledgments**

274 We acknowledge the Sierra Leone Ministry of Health and Partners In Health Sierra Leone for  
275 providing the enabling environment to conduct this study. We also want to thank Sustainable  
276 Health Systems for their partnership and collaboration in leading this effort. We thank Kristy Yiu  
277 (Unity Health Toronto) for her early support in coordinating the project. Finally, we want to  
278 express our profound gratitude to Mohamed Bailor Barrie, Jean Gregory Jerome, Kilongo Papy  
279 Mulailwa, and Pierre Ricard Pognon for their unwavering support.

280 **Funding:** This study was supported by the Canadian Institute of Health Research (Funding  
281 Reference Number W11-179883). SM's research program is supported by a Tier 2 Canada  
282 Research Chair in Mathematical Modeling and Program Science (CRC# 950-232643).

283 **Conflict of interest:** None to declare

284 **Author's contribution:** FB, ML, MMK, SL, SS, and AUN conceptualized and designed the study,  
285 with input from AKC and SM. FB and BM collated the aggregated data. ZAM and FB managed and  
286 analyzed data, with input from SM. FB and ZAM drafted the manuscript, with edits from AKC, SM,  
287 and SL. All co-authors reviewed and approved the final manuscript.

288 **Data availability:** The datasets (<https://doi.org/10.5061/dryad.rxwdbrvkx>) used and/or analyzed  
289 for this study are available from:

290 <http://datadryad.org/stash/share/TLn8N9UKXR9IF29JaOmw-PxDCoSjWleAS2lQlcqkGI4>.

291

292

293



## 294 **References**

- 295 1. Ministry of Health and Sanitation SL. Demographic and Health Survey report. 2019;
- 296 2. United Nations Global Compact. The Sustainable Development Goals Report 2018. United Nations  
297 Publ issued by Dep Econ Soc Aff. 2018;64.
- 298 3. Nuzzo JB, Meyer D, Snyder M, Ravi SJ, Lapascu A, Souleles J, et al. What makes health systems resilient  
299 against infectious disease outbreaks and natural hazards? Results from a scoping review. BMC Public  
300 Health. 2019;
- 301 4. Yerger P, Jalloh M, Coltart CEM, King C. Barriers to maternal health services during the Ebola outbreak  
302 in three West African countries: A literature review. BMJ Glob Heal. 2020;
- 303 5. Ngo TMP, Rogers B, Patnaik R, Jambai A, Sharkey AB. The Effect of Ebola Virus Disease on Maternal and  
304 Child Health Services and Child Mortality in Sierra Leone, 2014–2015: Implications for COVID-19. Am J  
305 Trop Med Hyg. 2021;104(3):1085–92.
- 306 6. Ribacke KJB, Saulnier DD, Eriksson A, Schreeb J von. Effects of the West Africa Ebola virus disease on  
307 health-care utilization - A systematic review. Front Public Heal. 2016;4(OCT):1–12.
- 308 7. Brolin Ribacke KJ, Van Duinen AJ, Nordenstedt H, Höjjer J, Molnes R, Froseth TW, et al. The impact of  
309 the West Africa Ebola outbreak on obstetric health care in Sierra Leone. PLoS One. 2016;
- 310 8. Aranda Z, Binde T, Tashman K, Tadikonda A, Mawindo B, Maweu D, et al. Disruptions in maternal health  
311 service use during the COVID-19 pandemic in 2020: Experiences from 37 health facilities in low-income  
312 and middle-income countries. BMJ Glob Heal. 2022;7(1):1–10.
- 313 9. Ahmed T, Robertson T, Vergeer P, Hansen PM, Peters MA, Ofosu AA, et al. Healthcare utilization and  
314 maternal and child mortality during the COVID-19 pandemic in 18 low- and middle-income countries:  
315 An interrupted time-series analysis with mathematical modeling of administrative data. PLoS Med.  
316 2022;19(8):1–20.
- 317 10. Kassa ZY, Scarf V, Fox D. The effect of Ebola virus disease on maternal health service utilisation and  
318 perinatal outcomes in West Africa: a systematic review. Reprod Health. 2022;
- 319 11. Decroo T, Delamou A, Reeder JC. Operational research: Did health systems in Sierra Leone recover

- 320 after the 2014-15 ebola outbreak? . F1000Research. 2019;8:8–11.
- 321 12. Partners in Health. Transforming Health in Kono District. 2024.
- 322 13. Sevalie S, Youkee D, Van Duinen AJ, Bailey E, Bangura T, Mangipudi S, et al. The impact of the COVID-  
323 19 pandemic on hospital utilisation in Sierra Leone. *BMJ Glob Heal*. 2021;
- 324 14. Sierra Leone Ministry of Health and Sanitation. Corona Virus Disease (COVID-19) Situational Report  
325 Report no 761 Date of Issue 30th April, 2022. 2022.
- 326 15. Liu Z, Gao L, Xue C, Zhao C, Liu T, Tia A, et al. Epidemiological Trends of Coronavirus Disease 2019 in  
327 Sierra Leone From March 2020 to October 2021. *Front Public Heal*. 2022;
- 328 16. Payne EH, Gebregziabher M, Hardin JW, Ramakrishnan V, Egede LE. An empirical approach to  
329 determine a threshold for assessing overdispersion in Poisson and negative binomial models for count  
330 data. *Commun Stat Simul Comput*. 2018;
- 331 17. United Nations. The Sustainable Development Goals in Sierra Leone. 2025.
- 332 18. Tilahun B, Nigusie A, Zelalem M MZ. Effect of COVID-19 Pandemic on Maternal and Child Health  
333 Services and Strategies for Effective Service Implementation in Ethiopia. *J Multidiscip Heal*. 2022;
- 334

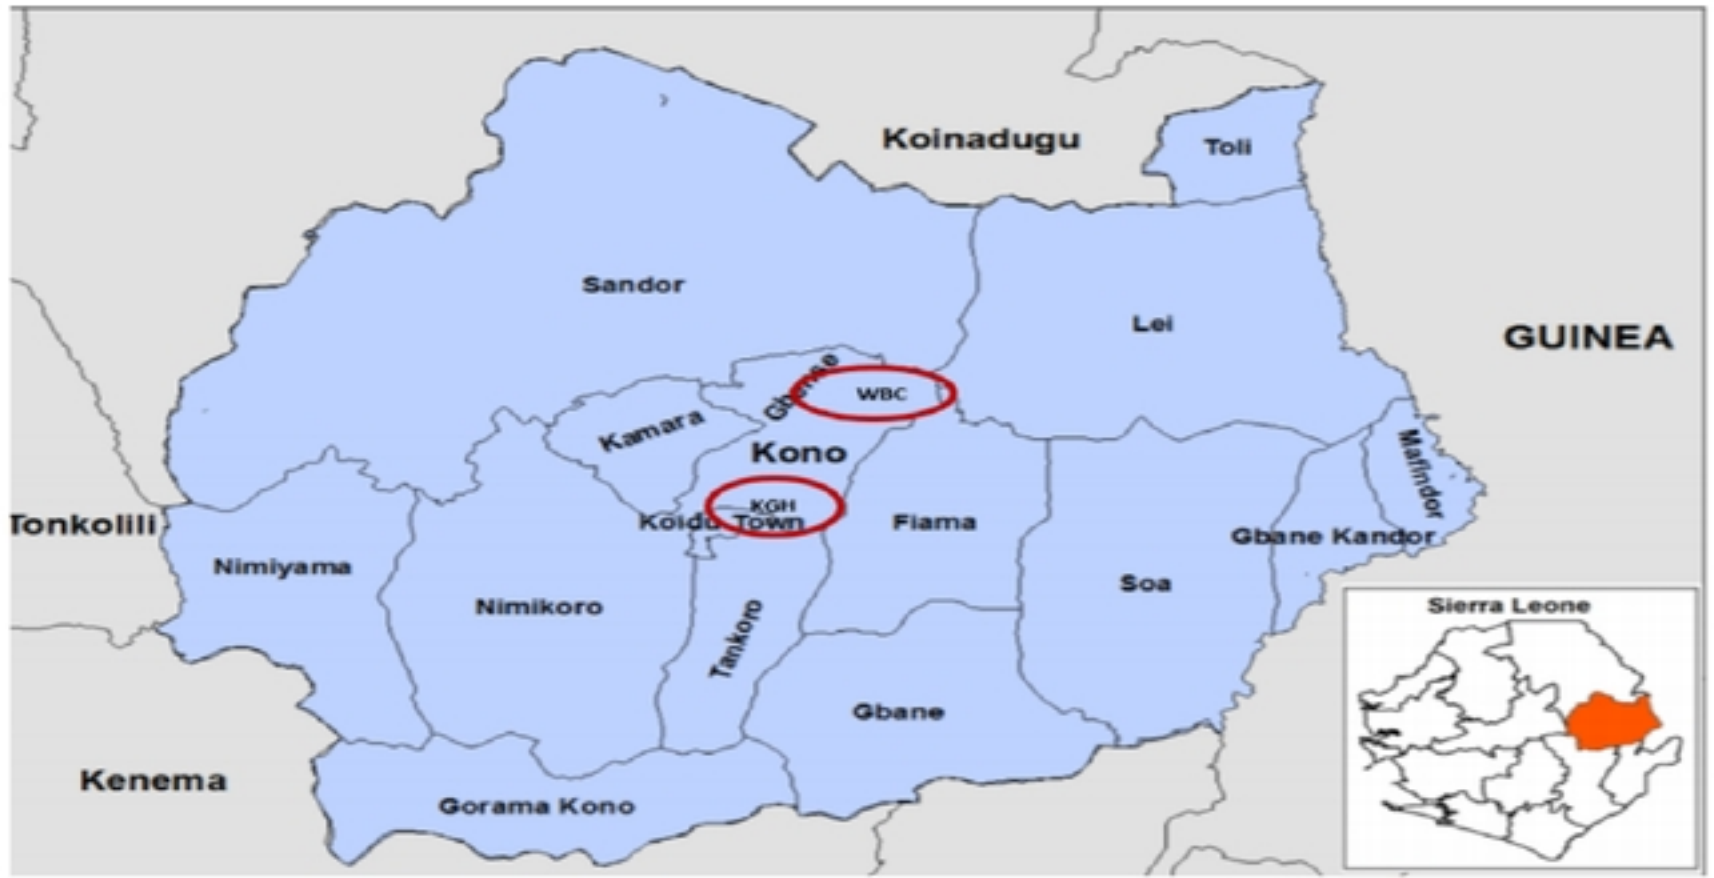

Figure 1: Map of study area

○ KGH & WBC

medRxiv preprint doi: <https://doi.org/10.1101/2025.01.22.25320951>; this version posted January 24, 2025. The copyright holder for this preprint (which was not certified by peer review) is the author/funder, who has granted medRxiv a license to display the preprint in perpetuity. It is made available under a [CC-BY 4.0 International license](https://creativecommons.org/licenses/by/4.0/).

Figure 1. Map of the study area

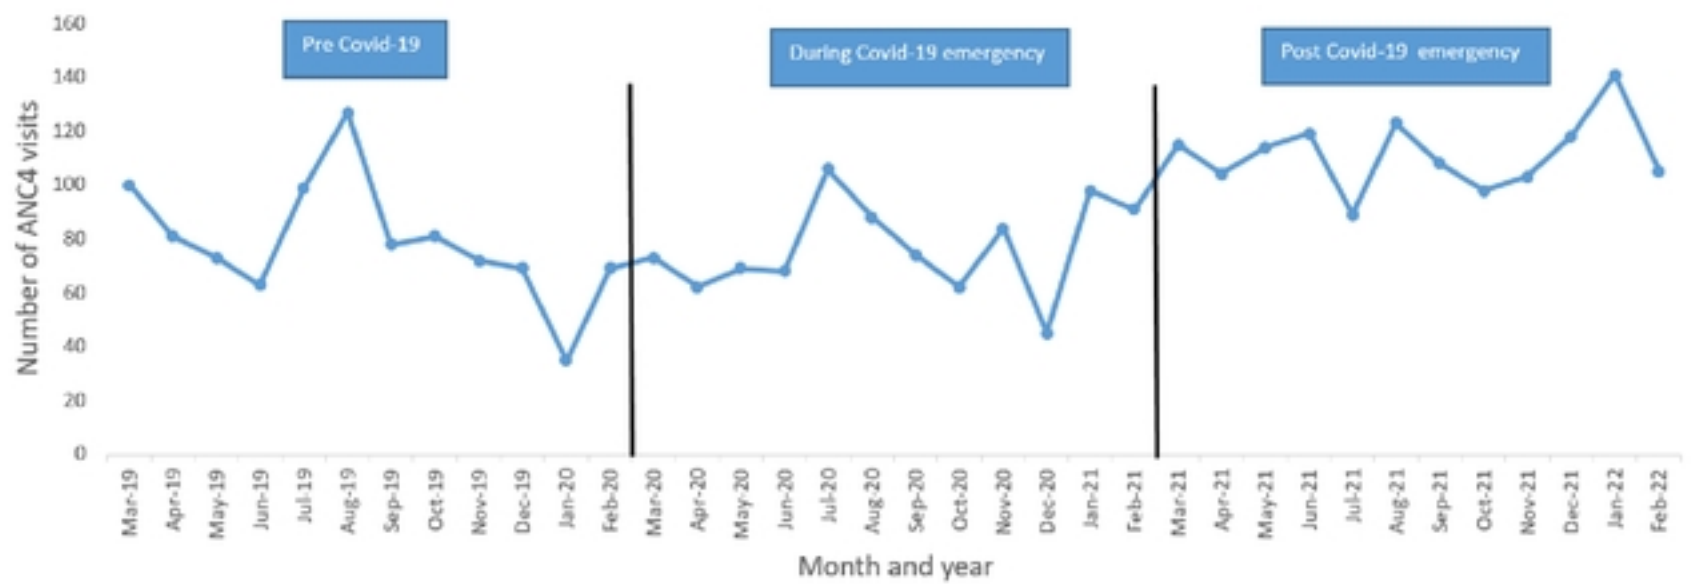

**Figure 2. Monthly number of ANC4 visits at two health facilities in Kono District, Sierra Leone, March 2019-Feb 2022.**  
 \*ANC4 refers to the fourth antenatal clinic visit.  
 \*Pre-COVID-19 (March 2019-Feb 2020), during COVID-19 Emergency (March 2020-Feb 2021), Post COVID-19 Emergency (March 2021-Feb 2022).

medRxiv preprint doi: <https://doi.org/10.1101/2025.01.22.25320951>; this version posted January 24, 2025. The copyright holder for this preprint (which was not certified by peer review) is the author/funder, who has granted medRxiv a license to display the preprint in perpetuity. It is made available under a [CC-BY 4.0 International license](https://creativecommons.org/licenses/by/4.0/).

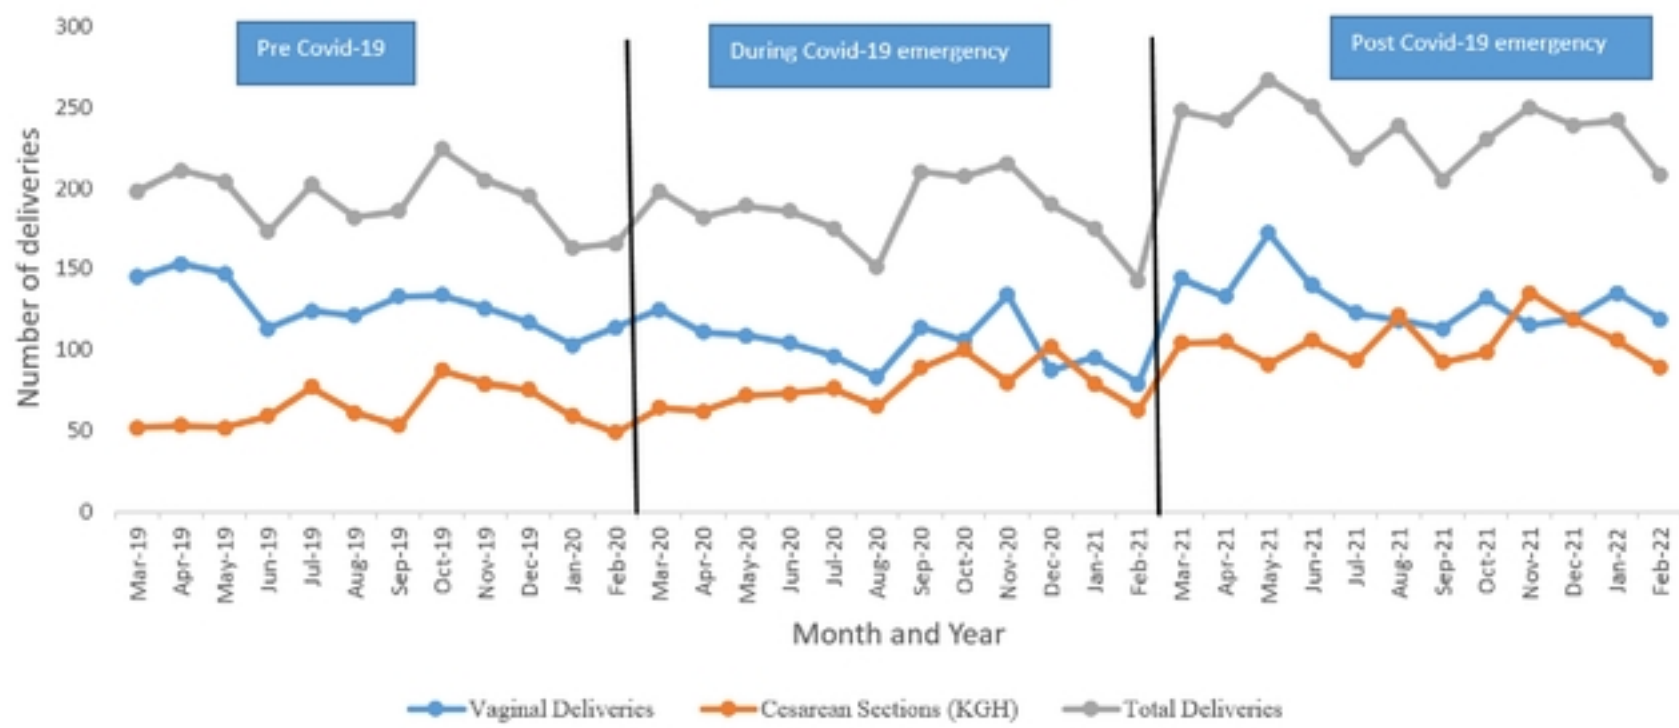

**Figure 3. Monthly number of deliveries at two health facilities in Kono District, Sierra Leone, March 2019-Feb 2022.**  
 \*Pre-COVID-19 (March 2019-Feb 2020), during COVID-19 Emergency (March 2020-Feb 2021), Post COVID-19 Emergency (March 2021-Feb 2022).  
 \*KGH refers to Koidu Government Hospital.

medRxiv preprint doi: <https://doi.org/10.1101/2025.01.22.25320951>; this version posted January 24, 2025. The copyright holder for this preprint (which was not certified by peer review) is the author/funder, who has granted medRxiv a license to display the preprint in perpetuity. It is made available under a [CC-BY 4.0 International license](https://creativecommons.org/licenses/by/4.0/).
